# Supplementary material
Source: PubMed Central journal article supplement (PMC7738407)
Supplement: NIHMS1634795-supplement-Supplemental_Material.pdf [file NIHMS1634795-supplement-Supplemental_Material.pdf]

**SUPPLEMENTAL MATERIAL**

## **SUPPLEMENTAL METHODS**

### **Pharmacy Claims and Estimation of Beta Blocker Exposure**

To examine medication exposure of the BB class equivalent doses across agents were established. This was based on what proportion of a target dose for each specific agent was used, taken as the target dose for systolic HF used in clinical trials, or the maximum daily dose for BB agents that are not approved for use in treating systolic HF (e.g., atenolol). Specifically, these target/maximal daily doses were 50mg for carvedilol, 200mg for metoprolol (for both long-acting and short-acting formulations), 10mg for bisoprolol, 100mg for atenolol, and 600 mg for labetalol. For example, 25 mg of carvedilol per day (i.e. 12.5 mg twice daily) was considered a 0.5 BB dose equivalent.

Chronic exposure to BB was then calculated as the drug-equivalent strength (described above) multiplied by the quantity of medication dispensed in a 6-month time block, divided by the total number of days in the 6-month time block. A specific BB exposure estimate was calculated for each patient for each day of follow up. Individual exposure measures reflected average exposure over the previous 6 months and could vary daily and could include periods of no exposure.

## **SUPPLEMENTAL FIGURE LEGENDS**

**Supplemental Figure 1.** HFPGR = Henry Ford Pharmacogenomic Registry<sup>35</sup>; TIME-CHF = the Trial of Intensified vs Standard Medical Therapy in Elderly Patients With Congestive Heart Failure<sup>36</sup>; HF-ACTION = the Heart Failure: A Controlled Trial Investigating Outcomes of Exercise Training<sup>37</sup>;

**Supplemental Figure 2.** Q-Q plot of the GWAS (Derivation cohort)

## **SUPPLEMENTAL FIGURES**

**Supplemental Figure 1.**

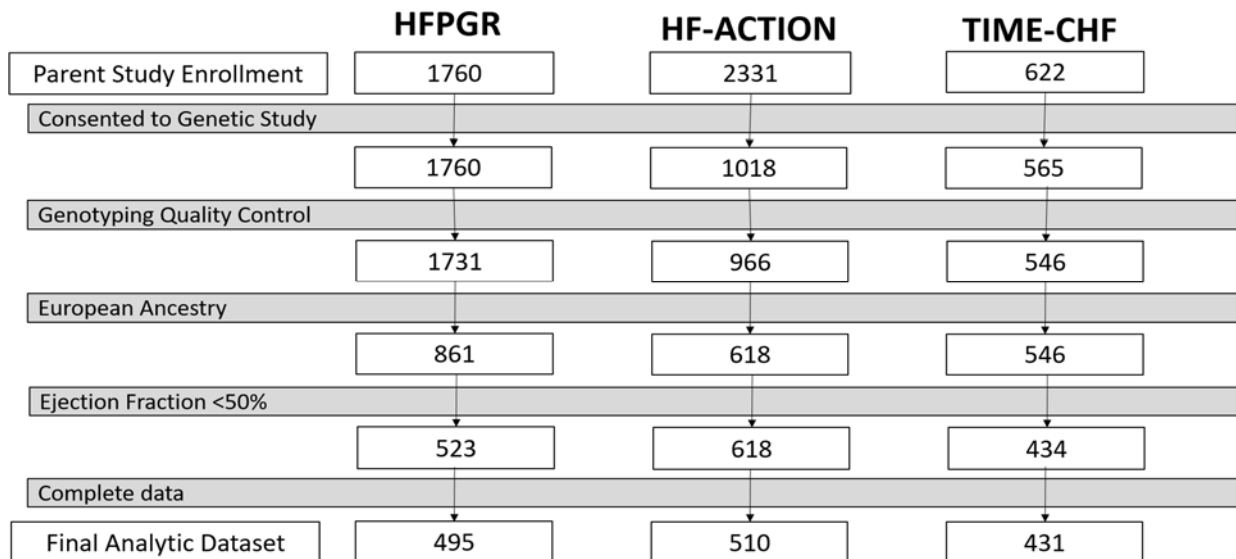

Supplemental Figure 2.

Q-Q plot of genomic controlled p-values

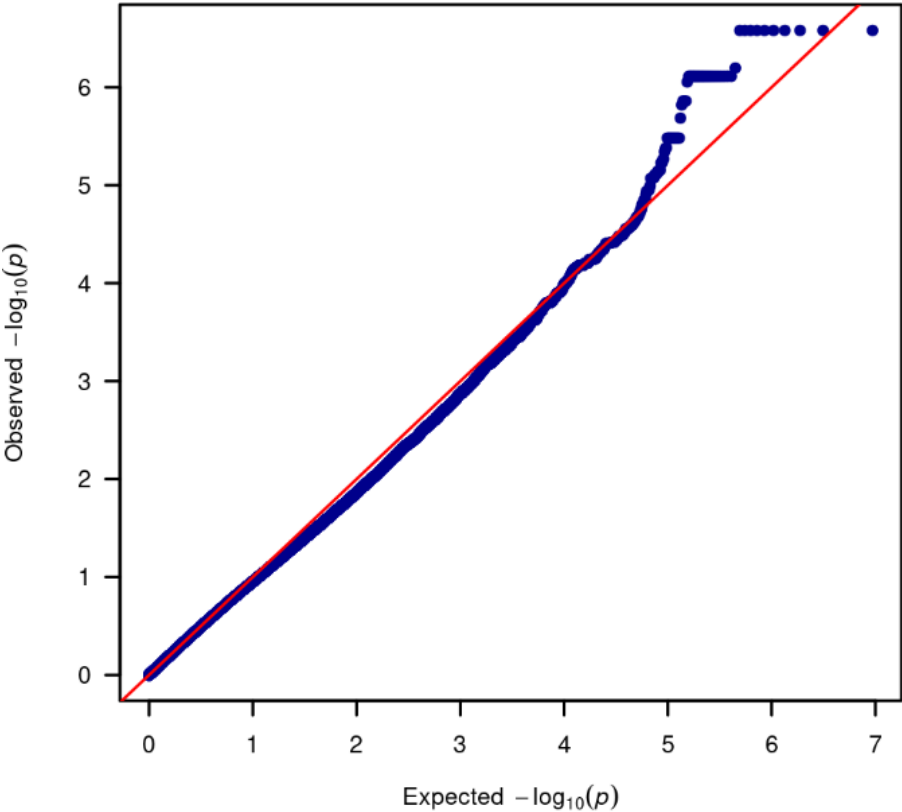

## **SUPPLEMENTAL TABLES**

**Supplemental Table 1.** Propensity Score Balance Check: Weighted Standardized Differences for each Cohort.

| <b>Variable</b>            | <b>HFPGR-Derivation</b> | <b>HFPGR-Test</b> | <b>HF-ACTION</b> | <b>TIME-CHF</b> |
|----------------------------|-------------------------|-------------------|------------------|-----------------|
| <b>Age</b>                 | 0.026                   | 0.011             | 0.317            | 0.06            |
| <b>Sex</b>                 | 0.051                   | 0.03              | 0.112            | 0.03            |
| <b>COPD</b>                | 0.058                   | 0.152             | 0.085            | 0.019           |
| <b>Atrial Fibrillation</b> | 0.04                    | 0.109             | 0.067            | 0.008           |
| <b>Ischemic Etiology</b>   | 0.008                   | 0.087             | 0.217            | 0.13            |
| <b>Stroke</b>              | 0.212                   | 0.131             | 0.202            | 0.047           |
| <b>Diabetes</b>            | 0.191                   | 0.059             | 0.09             | 0.033           |
| <b>Vascular Disease</b>    | 0.004                   | 0.165             | 0.164            | 0.037           |
| <b>Creatinine</b>          | 0.004                   | 0.057             | 0.112            | 0.01            |
| <b>Hypertension</b>        | 0.025                   | 0.012             | NA               | 0.185           |

**Supplemental Table 2.** List of 44 SNPs included in the BB polygenic response predictor (PRP) .

| Location (GRCh37) | rsID        | Imp. r <sup>2</sup> | Coef f. | MA F | p-value  | Ref | Alt | Gene (SNP type)     | Functional annotation in HaploReg <sup>#</sup> and GWAS catalog associations                                                                                      |
|-------------------|-------------|---------------------|---------|------|----------|-----|-----|---------------------|-------------------------------------------------------------------------------------------------------------------------------------------------------------------|
| 12:10538664<br>5  | rs4331189   | 0.95                | 4.36    | 0.14 | 2.63E-07 | T   | C   | C12orf45            | eQTL for C12orf45, SLC41A2, and MGC40397                                                                                                                          |
| 12:10535324<br>4  | rs4075503   | 0.90                | 4.33    | 0.14 | 8.83E-07 | G   | T   | none                | eQTL for SLC41A2 and C12orf45; possible reg. role to promoter histone mark, enhancer histone mark, DNase, Proteins bound & Motifs changed.                        |
| 5:2655779         | rs16870234  | 0.91                | 4.58    | 0.25 | 1.38E-06 | A   | G   | none                | Possible regulatory role to enhancer histone marks and motifs changed                                                                                             |
| 5:102978477       | rs75087282  | 0.86                | 4.71    | 0.12 | 1.52E-06 | A   | G   | none                | possible regulatory role to 4 altered motifs                                                                                                                      |
| 12:10804807<br>2  | rs28548659  | 0.98                | 4.72    | 0.10 | 3.30E-06 | T   | C   | BTBD11 (intronic)   | Possible regulatory role to 11 altered motifs                                                                                                                     |
| 4:11263913        | rs782760    | 0.88                | 3.60    | 0.28 | 4.14E-06 | C   | A   | none                | Possible regulatory role to enhancer histone marks (ESDR and ESC) and motifs changed (FAC1, RREB-1, Zfp105)                                                       |
| 3:32526153        | rs367841    | 0.86                | 3.97    | 0.32 | 5.39E-06 | T   | C   | CMTM6 (intronic)    | eQTL for CMTM6 and CMTM7; possible regulatory role to promoter histone marks (BLD), enhancer histone marks (ESDR, BLD), DNase, Proteins bound and Motifs changed. |
| 20:50686015       | rs6013374   | 0.88                | 4.02    | 0.16 | 5.49E-06 | C   | T   | none                | Possible regulatory role to Motifs changed (Evi-1)                                                                                                                |
| 19:57887748       | rs189508091 | 0.84                | 4.00    | 0.19 | 5.91E-06 | C   | A   | ZNF547 (intronic)   | eQTL for ZNF304, CTC-444N24.13, ZNF749; possible regulatory role to DNase (SKIN).                                                                                 |
| 12:29688202       | rs299453    | 0.67                | 3.87    | 0.35 | 7.16E-06 | T   | C   | TMTC1 (intronic)    | Possible reg. role to enhancer histone marks (LNG, FAT, BLD), DNase (ESDR, MUS), proteins bound (CEBPB) and motifs changed (TATA, TBX5)                           |
| 12:29683110       | rs299445    | 0.66                | 3.86    | 0.35 | 7.65E-06 | C   | T   | TMTC1 (intronic)    | Possible regulatory to enhancer histone mark (BLD) and motifs changed.                                                                                            |
| 12:10520008<br>8  | rs9737956   | 0.70                | 4.35    | 0.12 | 8.34E-06 | T   | C   | SLC41A2 (intronic)  | Possible regulatory role to motifs changed (Irx)                                                                                                                  |
| 3:175421845       | rs6773175   | 0.85                | 4.07    | 0.16 | 8.50E-06 | A   | G   | NAALADL2 (intronic) | Possible reg role to enhancer histone marks (GI) & motifs changed (Nrf-2)                                                                                         |
| 3:10455742        | rs34912     | 0.87                | 3.39    | 0.32 | 1.01E-05 | T   | A   | ATP2B2 (intronic)   | eQTL for GHRLOS; possible regulatory role to motifs changed (EBF, NF-KappaB, SZF1-1)                                                                              |
| 18:68373609       | rs2457492   | 0.84                | 3.15    | 0.25 | 1.12E-05 | G   | A   | none                | Possible regulatory role to enhancer histone mark (BLD)                                                                                                           |
| 13:82134871       | rs2225686   | 0.97                | 3.22    | 0.47 | 1.14E-05 | T   | G   | none                | Possible regulatory role to motifs changed (Myc, NF-kappaB, ZBTB33)                                                                                               |
| 12:29701516       | rs299468    | 0.71                | 3.80    | 0.35 | 1.14E-05 | C   | T   | TMTC1 (intronic)    | Possible regulatory role to enhancer histone mark (MUS) & DNase (BLD).                                                                                            |
| 17:48724199       | rs34221557  | 0.90                | 3.22    | 0.47 | 1.40E-05 | A   | C   | ABCC3 (intronic)    | Possible regulatory role to enhancer histone marks and motifs changed.                                                                                            |
| 5:102981016       | rs60529740  | 0.83                | 5.12    | 0.12 | 1.57E-05 | T   | G   | none                | Possible regulatory role to enhancer histone marks and motifs changed.                                                                                            |
| 9:14782367        | rs10810237  | 0.87                | 3.72    | 0.17 | 1.59E-05 | C   | T   | FREM1 (intronic)    | Possible regulatory role to Motifs changed (HNF1, Ncx).                                                                                                           |
| 9:14790092        | rs10756612  | 0.89                | 3.71    | 0.17 | 1.77E-05 | A   | C   | FREM1 (intronic)    | Possible regulatory role to DNase and motifs changed                                                                                                              |
| 19:14839160       | rs4808387   | 0.86                | 3.99    | 0.28 | 1.88E-05 | C   | T   | ZNF333 (intronic)   | eQTL for ZNF333, EMR2, DNAJB1 and ADGRE2; possible regulatory role to motifs changed (Irf).                                                                       |
| 8:26380683        | rs56098448  | 0.86                | 4.13    | 0.29 | 2.00E-05 | A   | T   | DPYSL2 (intronic)   | Possible regulatory role to motifs changed.                                                                                                                       |
| 19:57688175       | rs34335569  | 0.88                | 3.82    | 0.19 | 2.11E-05 | A   | G   | none                | eQTL for DUXA; possible regulatory role to motifs changed.                                                                                                        |
| 2:172525144       | rs1399958*  | NA                  | 4.14    | 0.12 | 2.12E-05 | T   | C   | none                | eQTL for CYBRD1, HAT1, and AC068039.4; possible regulatory role to enhancer histone marks and motifs changed.                                                     |
| 8:133095617       | rs62521322  | 0.83                | 3.71    | 0.42 | 2.51E-05 | G   | T   | HHLA1 (intronic)    | none                                                                                                                                                              |
| 10:22101608       | rs2666763   | 0.57                | 3.49    | 0.34 | 2.55E-05 | G   | A   | DNAJC1 (intronic)   | possible regulatory role to motifs changed (E2F, TBX5, Zfx)                                                                                                       |
| 3:148661164       | rs4681163   | 0.81                | 3.31    | 0.23 | 2.68E-05 | G   | A   | none                | eQTL for CPA3; possible regulatory role to enhancer histone marks and                                                                                             |

|             |            |      |      |      |          |   |   |                   |                                                                                                                                                |
|-------------|------------|------|------|------|----------|---|---|-------------------|------------------------------------------------------------------------------------------------------------------------------------------------|
| 2:20669737  | rs12988451 | 0.96 | 3.58 | 0.44 | 2.70E-05 | A | G | none              | motifs changed.                                                                                                                                |
| 4:166456085 | rs6828706  | 0.92 | 3.06 | 0.29 | 2.72E-05 | T | C | none              | eQTL for AC023137.2; possible regulatory role to enhancer histone marks, protein bounded (FOXA1), and motifs changed.                          |
| 18:3056415  | rs60971978 | 0.78 | 3.79 | 0.30 | 2.98E-05 | T | G | none              | possible regulatory role to motifs changed (LUN-1).                                                                                            |
| 17:10829256 | rs4527059  | 0.96 | 3.89 | 0.21 | 3.19E-05 | A | G | none              | Imporant regulatory role to enhancer histone marks and motifs changed.                                                                         |
| 7:101285877 | rs2527834  | 0.99 | 3.60 | 0.44 | 3.32E-05 | T | C | none              | Imporant regulatory role to DNase and motifs changed.                                                                                          |
| 6:109554233 | rs12528081 | 0.93 | 4.14 | 0.36 | 3.41E-05 | T | C | none              | possible regulatory role to motifs changed.                                                                                                    |
| 1:54772851  | rs4413992  | 0.74 | 3.26 | 0.40 | 3.48E-05 | A | G | SSBP3 (intronic)  | eQTL for CD164, RP11-425D10.10 and CCDC162P; possible regulatory role to motifs changed (Smad).                                                |
| 11:12921701 | rs4514425  | 0.91 | 3.43 | 0.30 | 3.59E-05 | T | C | none              | Possible reg. role to enhancer histone marks & motifs changed (HEN1).                                                                          |
| 2           |            |      |      |      |          |   |   |                   | Possible regulatory role to DNase and motifs changed.                                                                                          |
| 10:34802967 | rs4934638* | NA   | 3.32 | 0.23 | 3.61E-05 | T | C | PARD3 (intronic)  | Possible regulatory role to enhancer histone marks and motifs changed.                                                                         |
| 19:2058694  | rs10416900 | 0.61 | 3.75 | 0.16 | 3.65E-05 | T | C | none              | Possible regulatory role to DNase and motifs changed.                                                                                          |
| 1:116067883 | rs61797384 | 0.86 | 5.15 | 0.13 | 3.90E-05 | C | T | none              | eQTL for VANGL1; possible regulatory role to enhancer histone marks, DNase, and motifs changed.                                                |
| 3:44350264  | rs2171574  | 0.85 | 3.19 | 0.16 | 3.92E-05 | A | G | TOPAZ1 (intronic) | eQTL for ZNF660, TCAIM, LINC00694, and RP11-424N24.2                                                                                           |
| 3:10474448  | rs34854    | 0.79 | 3.27 | 0.22 | 3.97E-05 | T | C | ATP2B2 (intronic) | eQTL for GHRLOS and ATP2B2; possible regulatory role to enhancer histone marks, DNase, proteins bound and motifs changed.                      |
| 17:77090828 | rs60764725 | 0.89 | 3.72 | 0.23 | 4.04E-05 | C | T | RBFOX3 (intronic) | eQTL for ENGASE; possible regulatory role to enhancer histone marks, DNase and motifs changed.                                                 |
| 4:120522172 | rs10518335 | 0.97 | 3.20 | 0.22 | 4.15E-05 | T | C | PDE5A (intronic)  | eQTL for USP53, RP11-33B1.1, RP11-33B1.4, and PDE5A; possible reg. role to motifs changed. GWAS association with acute myeloid leukemia        |
| 10:21889138 | rs6577189  | 0.86 | 3.25 | 0.35 | 4.29E-05 | A | G | MLLT10 (intronic) | eQTL for MLLT10; possible regulatory role to enhancer histone marks & motifs changed. GWAS association to urinary albumin to creatinine ratio. |

\* SNP genotyped on array (all others were imputed). P values shown are for the SNP\*BB interaction term in the derivation

cohort (HFPGR-derivation) with genomic control. Imp.= Imputation
